# Supplementary material for: A systematic study of gene expression variation at single-nucleotide resolution reveals widespread regulatory roles for uAUGs
Source: HighWire-hosted journal article supplement (doi:10.1101/gr.117366.110), 2012-03-27
Supplement: YYUN_Supp_TableS3_Expression_Variation_GAL1.xlsx [file YYUN_Supp_TableS3_Expression_Variation_GAL1.xlsx]

## Sheet: Sheet1
Base	Scer	Mutation	Median_Expression_Ratio
1	A	C	1.01
2	T	G	1.06
3	A	T	1.02
4	T	G	1.02
5	C	A	1.09
6	A	T	0.98
7	A	T	0.99
8	A	C	0.99
9	A	C	0.98
10	A	C	0.82
11	A	T	1
12	G	A	1.03
13	A	T	0.97
14	G	A	1.07
15	G	A	1.09
16	A	T	0.03
17	A	G	1.07
18	C	A	1.02
19	T	G	1.03
20	G		No Data
21	C	G	1
22	A	T	1.07
23	A	C	0.92
24	T	A	1
25	T	C	0.96
26	T	C	0.86
27	C	T	0.98
28	A		No Data
29	T	C	1.02
30	A	C	0.98
31	T		No Data
32	C	G	1.01
33	T	C	1.01
34	C	A	1.03
35	C		No Data
36	A	G	0.03
37	T	G	0.98
38	A	C	1.05
39	T	A	0.96
40	A	G	1.09
41	A	G	0.9
42	T	C	0.84
43	T	G	1.13
44	G		No Data
45	T	G	0.01
46	T	G	1.01
47	A	T	1.01
48	A	G	1.04
49	A	C	1.06
50	A	C	1
51	A	G	0.93
52	A	G	0.95
53	C	A	0.94
54	A	G	0.93
55	A	C	0.85
56	C	T	1.08
57	T	G	0.93
58	A	G	0.84
59	T	G	0.9
60	G	T	0.92
61	A	C	0.89
62	A	C	0.95
63	A	C	0.96
64	A	G	0.92
65	T	G	0.96
66	A	C	0.94
67	C	A	0.93
68	T	C	0.9
69	G	A	0.97
70	T	A	0.96
71	A	C	1.14
72	A	C	1.11
73	A	T	1.05
74	C	T	1.01
75	T	G	1.07
76	T	A	1.05
77	A	T	1.03
78	T	C	1.02
79	T	A	1.01
80	C	A	0.99
81	T	G	0.99
82	T	G	1
83	C		No Data
84	A	T	0.38
85	T	G	1.04
86	T	A	1.11
87	A	C	1.16
88	T	C	1.16
89	G	A	1.12
90	T	A	1.11
91	T	G	1.07
92	T	A	1.06
93	G	A	1
94	A	G	1.09
95	C	T	1.08
96	T	G	1.03
97	T	G	1.03
98	T	G	0.99
99	T	A	0.92
100	A	G	0.92
101	C	A	0.86
102	A	G	0.91
103	A	C	0.98
104	C	A	0.96
105	T	G	0.92
106	T	A	0.92
107	T	G	1
108	C	A	0.92
109	A	C	0.94
110	T	G	0.9
111	A	T	0.9
112	A	G	0.99
113	T	A	1.02
114	C	A	0.98
115	A	T	1.01
116	A	T	1.02
117	T	G	1.07
118	T	A	0.98
119	T	A	1
120	C	A	1.05
121	A	G	0.97
122	C	A	1.03
123	C	A	0.91
124	A	T	0.94
125	A	C	1.01
126	T	G	0.96
127	A	G	1.06
128	C	G	1.01
129	G	T	1.03
130	T	A	1
131	C	A	1.05
132	G	A	0.99
133	A	G	1.05
134	A	C	1.06
135	A	C	1.08
136	A	C	1.07
137	G	A	0.9
138	G	A	0.97
139	T	G	1.06
140	A	C	0.7
141	A	T	0.8
142	A	G	0.24
143	T	A	0.87
144	A	C	0.01
145	T	G	0.21
146	A	C	0.52
147	T		No Data
148	A	T	0.95
149	G	T	0.91
150	A	T	1.02
151	C	G	0.98
152	A	C	1.03
153	A	C	1.06
154	T	G	1.02
155	T	G	1.06
156	A	G	1.02
157	T		No Data
158	C	A	1.06
159	T		No Data
160	A	T	1.04
161	G	T	1.03
162	T	A	0.98
163	T	A	1.02
164	T	G	1.01
165	T	A	1.03
166	T	G	1.04
167	A		No Data
168	G	A	0.97
169	T		No Data
170	A	G	1.12
171	G	A	1.08
172	C	T	1.07
173	G	T	1.03
174	A	C	1.05
175	A	G	1.04
176	G	A	1.04
177	C	A	0.99
178	G	T	1
179	A	G	1.01
180	C	G	0.99
181	T	A	0.98
182	A	G	1
183	A	C	1.03
184	T	C	1.04
185	T	C	1.12
186	A	T	0.88
187	A	G	1.1
188	T		No Data
189	G		No Data
190	G	T	1.01
191	G	A	1.02
192	G	T	0.98
193	T	C	1
194	C	G	1.02
195	T	A	1.01
196	T		No Data
197	T	G	1.05
198	A	T	1.14
199	T		No Data
200	T		No Data
201	C	A	1.07
202	C	G	1.08
203	G	A	0.99
204	A	C	1.04
205	T	C	1.01
206	T	G	0.99
207	T	G	1.04
208	T	A	1
209	T	A	1
210	T	A	1.02
211	G	A	1.02
212	A	C	1.06
213	T	G	1.07
214	T	A	1.04
215	A	T	1.02
216	G	A	1.04
217	C	T	1.01
218	G	A	1
219	T	C	1
220	A	G	0.99
221	A	G	1
222	T		No Data
223	A	T	0.94
224	G	A	0.94
225	T	G	1.07
226	A	T	1.05
227	G	T	1.01
228	G	T	1.02
229	A	C	0.98
230	T		No Data
231	A	C	1.02
232	C		No Data
233	C	A	0.98
234	A	T	0.93
235	A	C	0.95
236	C	T	0.95
237	A	T	0.95
238	A	G	0.99
239	T	A	1.07
240	T	A	1.02
241	A		No Data
242	A	T	1
243	A	G	1.04
244	C	G	1
245	T		No Data
246	A	C	0.95
247	A	C	1
248	G	T	1.07
249	C	G	0.98
250	A	C	1
251	A	G	1.03
252	T		No Data
253	T	A	1.01
254	A	C	1.03
255	A	G	1.06
256	A	C	1.03
257	C	T	0.69
258	T	G	1.02
259	T	G	1.02
260	C	A	0.99
261	C	G	1.01
262	A	T	0.99
263	A	T	0.97
264	A	G	0.99
265	C	T	0.92
266	A	G	0.97
267	C	T	1.15
268	C	A	1.04
269	C	A	0.98
270	C	G	1.05
271	G	T	1.05
272	G	A	1.17
273	T	A	1
274	C	A	1
275	C	A	1.03
276	A	T	0.97
277	A	T	0.96
278	T	C	0.95
279	G	T	0.95
280	A	C	0.96
281	C	A	0.95
282	G	T	1
283	G	A	0.97
284	T	A	0.98
285	T	A	0.98
286	A	T	0.99
287	A	T	0.95
288	A	T	0.97
289	A	T	1.01
290	A	G	0.97
291	G	A	1.11
292	G	T	1.04
293	A	T	0.98
294	G	T	0.95
295	A	G	1.16
296	A	C	1.09
297	G	A	0.53
298	T	A	1
299	A	T	1.02
300	T	G	1.06
301	T	C	1.03
302	G	T	0.95
303	G	C	0.96
304	T	G	1.02
305	A	C	1.01
306	T	G	1.03
307	T	G	0.99
308	T	A	0.93
309	T	C	1.04
310	C	T	1.01
311	G	T	1.01
312	A	G	1.04
313	T	C	1.04
314	C	A	1
315	A	C	1.01
316	T	A	1.02
317	A	T	1.01
318	A	G	1
319	C	T	1
320	A	G	0.97
321	T	A	0.97
322	C	A	0.92
323	T	A	1.01
324	T	A	1.01
325	A	C	1.01
326	G	T	1
327	A	G	0.98
328	A	T	0.99
329	A	C	0.96
330	T	A	0.99
331	A	C	1.06
332	A		No Data
333	C	A	0.99
334	A	T	0.97
335	A	G	0.97
336	G	A	0.7
337	C	A	0.74
338	C	A	0.77
339	T	C	1
340	C	T	1.03
341	G	A	1.08
342	T	A	0.99
343	C	T	1.02
344	A	G	1
345	C	G	1.03
346	G	A	1.03
347	C	T	1.02
348	C		No Data
349	G	T	1.1
350	C	G	1.04
351	G	T	0.86
352	C	A	0.68
353	T		No Data
354	C	A	1.05
355	C	A	1.03
356	G	A	1.06
357	T	C	1.05
358	G	A	1.06
359	T	A	1
360	A	G	1
361	G	T	1.03
362	A	T	1.03
363	C	T	1.01
364	G	A	1.01
365	C		No Data
366	A	G	1.16
367	A	C	1.09
368	A	C	1.09
369	G	T	1
370	T	C	1.07
371	C	A	1.09
372	C	T	1.11
373	T		No Data
374	T	G	1.08
375	G	A	1.08
376	C	A	1.05
377	G	A	1.03
378	C	T	1
379	T		No Data
380	G	A	1.07
381	G	T	1.04
382	C	G	1.03
383	C	T	1.03
384	A	G	1.02
385	C	T	1.01
386	T		No Data
387	T	G	0.7
388	C	T	0.93
389	T	A	0.95
390	G	A	0.99
391	C	T	0.96
392	T		No Data
393	C	A	1.14
394	C	G	1.13
395	T	A	1.14
396	G	C	1.06
397	C	G	1.07
398	G	A	1.08
399	T	A	1.17
400	G	T	1.01
401	C	A	0.75
402	C	T	0.79
403	T	C	1.04
404	C	A	1
405	C	A	1.02
406	T	A	1.01
407	C	T	1.1
408	T	A	1.11
409	C	G	1.07
410	A		No Data
411	G	T	1.07
412	A	G	1.04
413	A	G	1.05
414	G	T	0.93
415	G	T	0.85
416	C	A	1
417	A		No Data
418	G	A	0.89
419	C	A	0.74
420	C	G	0.81
421	T	A	1.05
422	C	T	1.06
423	C	A	1.06
424	C	A	1.08
425	G	T	1.03
426	A	C	1.02
427	C	G	1.02
428	A	T	1.01
429	G	A	1.01
430	C	T	0.99
431	G	A	1.02
432	G		No Data
433	G	T	0.76
434	C	T	0.89
435	G	T	1.01
436	A	T	0.93
437	G	A	0.85
438	C	A	0.83
439	C	G	0.87
440	G	A	0.99
441	C	T	1
442	C	G	0.95
443	G	T	0.96
444	A	C	0.94
445	A	C	0.9
446	G	A	0.89
447	A		No Data
448	T	A	0.91
449	T	G	1.03
450	A	G	1.02
451	G	A	0.85
452	G	T	0.84
453	C	G	0.86
454	A	T	1.02
455	T	A	0.97
456	G	A	0.97
457	A	G	0.95
458	A	G	0.94
459	G	A	0.94
460	T	C	0.94
461	T	A	0.93
462	A	G	0.91
463	T	A	1.04
464	A	T	1.03
465	T	C	1.03
466	C	A	0.98
467	G	T	1
468	T	A	1.04
469	T	G	0.99
470	A	T	0.97
471	C	A	0.94
472	T	A	0.95
473	C	G	0.96
474	G	A	0.95
475	T	C	0.94
476	C	T	0.96
477	A	T	1.07
478	A	G	1.06
479	T	A	1.06
480	T	A	1.06
481	C	T	1.04
482	G		No Data
483	C	A	1.03
484	A		No Data
485	T	A	1.02
486	A	G	1.01
487	A	G	1.01
488	T	A	1
489	G	A	1.06
490	A	T	0.94
491	C	A	1.03
492	T		No Data
493	T	G	1.06
494	T		No Data
495	C	T	1.03
496	A		No Data
497	A	T	1.03
498	G	C	1.01
499	G	A	1
500	T	C	1
501	T	G	0.97
502	T	G	0.97
503	C	G	0.97
504	T	C	0.95
505	C	A	1.1
506	T		No Data
507	T	A	1.04
508	C	T	1.04
509	C	G	1.02
510	A	T	1
511	A	T	1.01
512	A	T	0.99
513	A	T	1
514	A	T	1
515	A	T	1
516	A	G	1.08
517	T	C	1.09
518	C	A	1.07
519	C	T	1.01
520	G	T	1
521	A		No Data
522	T	A	1.03
523	T	A	1.04
524	C	G	1.11
525	T	A	1.05
526	A		No Data
527	T	A	1.05
528	T	A	1.03
529	A	T	1.06
530	C	T	1.01
531	C	A	1.02
532	C	T	0.99
533	C	T	1.03
534	G	A	1.02
535	A	T	0.97
536	G	T	0.94
537	A	C	1
538	A	T	1.04
539	A	T	1
540	T	C	0.98
541	G	T	0.99
542	T	G	0.98
543	A	T	1
544	A	T	1
545	A	T	No Data
546	G	T	0.89
547	G	T	1.02
548	T		No Data
549	G	A	1.01
550	T	A	1
551	T	G	0.98
552	G	C	0.98
553	T	A	1.05
554	A	G	1
555	T	G	1.02
556	A	G	0.97
557	T	C	1
558	T	G	1
559	C	A	0.94
560	A	G	0.98
561	T	C	1.06
562	T	A	1.1
563	C	T	1.07
564	T	A	1.09
565	A	C	1.04
566	A	T	1.03
567	T	C	1.04
568	C	A	1.01
569	T	A	1.01
570	A	G	0.98
571	T	A	0.96
572	A	T	0.96
573	C	A	0.97
574	C	T	0.95
575	T	A	1.02
576	A	T	1.03
577	T		No Data
578	A	T	1.02
579	C	T	0.99
580	A	T	1
581	T	A	1.01
582	A	T	1.02
583	T	C	1.08
584	A	G	0.97
585	C	G	0.97
586	C	A	0.97
587	A	T	0.97
588	C	T	0.93
589	C	T	1
590	A	T	1.03
591	T	A	1
592	T	A	1.01
593	A	T	0.99
594	C		No Data
595	G	A	1.01
596	G	T	1.01
597	T	C	0.97
598	A	G	1
599	C	G	0.99
600	A	T	0.97
601	T	A	0.97
602	T		No Data
603	A	T	1
604	T	C	1.19
605	A	G	1.13
606	C	G	1.09
607	T	C	1.15
608	A	G	1.13
609	A	G	1.11
610	T	C	1.1
611	A	T	1.09
612	A	G	1.06
613	T	A	1.06
614	T	C	1.08
615	T		No Data
616	G	A	1.05
617	A	T	1.13
618	A	T	1.13
619	G	A	1.05
620	A	T	0.98
621	A		No Data
622	A	T	1.05
623	C	G	1.05
624	G	T	1.06
625	C	A	1.16
626	A	T	1.16
627	G	T	1.03
628	G	T	1.15
629	T	A	1.06
630	A	T	1.06
