# Supplementary material for: A systematic study of gene expression variation at single-nucleotide resolution reveals widespread regulatory roles for uAUGs
Source: HighWire-hosted journal article supplement (doi:10.1101/gr.117366.110), 2012-03-27
Supplement: YYUN_Supp_TableS4__GenBank_Accession_Numbers.xlsx [file YYUN_Supp_TableS4__GenBank_Accession_Numbers.xlsx]

## Sheet: Sheet1
GenBank Submission File Name	Sequence Submission Name	GenBank Accession Number
603Seq_sequin_submission_02142012.sqn	Seq_1_GAL1_A1C	JQ676216
603Seq_sequin_submission_02142012.sqn	Seq_2_GAL1_T2G	JQ676217
603Seq_sequin_submission_02142012.sqn	Seq_3_GAL1_A3T	JQ676218
603Seq_sequin_submission_02142012.sqn	Seq_4_GAL1_T4G	JQ676219
603Seq_sequin_submission_02142012.sqn	Seq_5_GAL1_C5A	JQ676220
603Seq_sequin_submission_02142012.sqn	Seq_6_GAL1_A6T	JQ676221
603Seq_sequin_submission_02142012.sqn	Seq_7_GAL1_A7T	JQ676222
603Seq_sequin_submission_02142012.sqn	Seq_8_GAL1_A8C	JQ676223
603Seq_sequin_submission_02142012.sqn	Seq_9_GAL1_A9C	JQ676224
603Seq_sequin_submission_02142012.sqn	Seq_10_GAL1_A10C	JQ676225
603Seq_sequin_submission_02142012.sqn	Seq_11_GAL1_A11T	JQ676226
603Seq_sequin_submission_02142012.sqn	Seq_12_GAL1_G12A	JQ676227
603Seq_sequin_submission_02142012.sqn	Seq_13_GAL1_A13T	JQ676228
603Seq_sequin_submission_02142012.sqn	Seq_14_GAL1_G14A	JQ676229
603Seq_sequin_submission_02142012.sqn	Seq_15_GAL1_G15A	JQ676230
603Seq_sequin_submission_02142012.sqn	Seq_16_GAL1_A16T	JQ676231
603Seq_sequin_submission_02142012.sqn	Seq_17_GAL1_A17G	JQ676232
603Seq_sequin_submission_02142012.sqn	Seq_18_GAL1_C18A	JQ676233
603Seq_sequin_submission_02142012.sqn	Seq_19_GAL1_T19G	JQ676234
603Seq_sequin_submission_02142012.sqn	Seq_20_GAL1_C21G	JQ676235
603Seq_sequin_submission_02142012.sqn	Seq_21_GAL1_A22T	JQ676236
603Seq_sequin_submission_02142012.sqn	Seq_22_GAL1_A23C	JQ676237
603Seq_sequin_submission_02142012.sqn	Seq_23_GAL1_T24A	JQ676238
603Seq_sequin_submission_02142012.sqn	Seq_24_GAL1_T25C	JQ676239
603Seq_sequin_submission_02142012.sqn	Seq_25_GAL1_T26C	JQ676240
603Seq_sequin_submission_02142012.sqn	Seq_26_GAL1_C27T	JQ676241
603Seq_sequin_submission_02142012.sqn	Seq_27_GAL1_T29C	JQ676242
603Seq_sequin_submission_02142012.sqn	Seq_28_GAL1_A30C	JQ676243
603Seq_sequin_submission_02142012.sqn	Seq_29_GAL1_C32G	JQ676244
603Seq_sequin_submission_02142012.sqn	Seq_30_GAL1_T33C	JQ676245
603Seq_sequin_submission_02142012.sqn	Seq_31_GAL1_C34A	JQ676246
603Seq_sequin_submission_02142012.sqn	Seq_32_GAL1_A36G	JQ676247
603Seq_sequin_submission_02142012.sqn	Seq_33_GAL1_T37G	JQ676248
603Seq_sequin_submission_02142012.sqn	Seq_34_GAL1_A38C	JQ676249
603Seq_sequin_submission_02142012.sqn	Seq_35_GAL1_T39A	JQ676250
603Seq_sequin_submission_02142012.sqn	Seq_36_GAL1_A40G	JQ676251
603Seq_sequin_submission_02142012.sqn	Seq_37_GAL1_A41G	JQ676252
603Seq_sequin_submission_02142012.sqn	Seq_38_GAL1_T42C	JQ676253
603Seq_sequin_submission_02142012.sqn	Seq_39_GAL1_T43G	JQ676254
603Seq_sequin_submission_02142012.sqn	Seq_40_GAL1_T45G	JQ676255
603Seq_sequin_submission_02142012.sqn	Seq_41_GAL1_T46G	JQ676256
603Seq_sequin_submission_02142012.sqn	Seq_42_GAL1_A47T	JQ676257
603Seq_sequin_submission_02142012.sqn	Seq_43_GAL1_A48G	JQ676258
603Seq_sequin_submission_02142012.sqn	Seq_44_GAL1_A49C	JQ676259
603Seq_sequin_submission_02142012.sqn	Seq_45_GAL1_A50C	JQ676260
603Seq_sequin_submission_02142012.sqn	Seq_46_GAL1_A51G	JQ676261
603Seq_sequin_submission_02142012.sqn	Seq_47_GAL1_A52G	JQ676262
603Seq_sequin_submission_02142012.sqn	Seq_48_GAL1_C53A	JQ676263
603Seq_sequin_submission_02142012.sqn	Seq_49_GAL1_A54G	JQ676264
603Seq_sequin_submission_02142012.sqn	Seq_50_GAL1_A55C	JQ676265
603Seq_sequin_submission_02142012.sqn	Seq_51_GAL1_C56T	JQ676266
603Seq_sequin_submission_02142012.sqn	Seq_52_GAL1_T57G	JQ676267
603Seq_sequin_submission_02142012.sqn	Seq_53_GAL1_A58G	JQ676268
603Seq_sequin_submission_02142012.sqn	Seq_54_GAL1_T59G	JQ676269
603Seq_sequin_submission_02142012.sqn	Seq_55_GAL1_G60T	JQ676270
603Seq_sequin_submission_02142012.sqn	Seq_56_GAL1_A61C	JQ676271
603Seq_sequin_submission_02142012.sqn	Seq_57_GAL1_A62C	JQ676272
603Seq_sequin_submission_02142012.sqn	Seq_58_GAL1_A63C	JQ676273
603Seq_sequin_submission_02142012.sqn	Seq_59_GAL1_A64G	JQ676274
603Seq_sequin_submission_02142012.sqn	Seq_60_GAL1_T65G	JQ676275
603Seq_sequin_submission_02142012.sqn	Seq_61_GAL1_A66C	JQ676276
603Seq_sequin_submission_02142012.sqn	Seq_62_GAL1_C67A	JQ676277
603Seq_sequin_submission_02142012.sqn	Seq_63_GAL1_T68C	JQ676278
603Seq_sequin_submission_02142012.sqn	Seq_64_GAL1_G69A	JQ676279
603Seq_sequin_submission_02142012.sqn	Seq_65_GAL1_T70A	JQ676280
603Seq_sequin_submission_02142012.sqn	Seq_66_GAL1_A71C	JQ676281
603Seq_sequin_submission_02142012.sqn	Seq_67_GAL1_A72C	JQ676282
603Seq_sequin_submission_02142012.sqn	Seq_68_GAL1_A73T	JQ676283
603Seq_sequin_submission_02142012.sqn	Seq_69_GAL1_C74T	JQ676284
603Seq_sequin_submission_02142012.sqn	Seq_70_GAL1_T75G	JQ676285
603Seq_sequin_submission_02142012.sqn	Seq_71_GAL1_T76A	JQ676286
603Seq_sequin_submission_02142012.sqn	Seq_72_GAL1_A77T	JQ676287
603Seq_sequin_submission_02142012.sqn	Seq_73_GAL1_T78C	JQ676288
603Seq_sequin_submission_02142012.sqn	Seq_74_GAL1_T79A	JQ676289
603Seq_sequin_submission_02142012.sqn	Seq_75_GAL1_C80A	JQ676290
603Seq_sequin_submission_02142012.sqn	Seq_76_GAL1_T81G	JQ676291
603Seq_sequin_submission_02142012.sqn	Seq_77_GAL1_T82G	JQ676292
603Seq_sequin_submission_02142012.sqn	Seq_78_GAL1_A84T	JQ676293
603Seq_sequin_submission_02142012.sqn	Seq_79_GAL1_T85G	JQ676294
603Seq_sequin_submission_02142012.sqn	Seq_80_GAL1_T86A	JQ676295
603Seq_sequin_submission_02142012.sqn	Seq_81_GAL1_A87C	JQ676296
603Seq_sequin_submission_02142012.sqn	Seq_82_GAL1_T88C	JQ676297
603Seq_sequin_submission_02142012.sqn	Seq_83_GAL1_G89A	JQ676298
603Seq_sequin_submission_02142012.sqn	Seq_84_GAL1_T90A	JQ676299
603Seq_sequin_submission_02142012.sqn	Seq_85_GAL1_T91G	JQ676300
603Seq_sequin_submission_02142012.sqn	Seq_86_GAL1_T92A	JQ676301
603Seq_sequin_submission_02142012.sqn	Seq_87_GAL1_G93A	JQ676302
603Seq_sequin_submission_02142012.sqn	Seq_88_GAL1_A94G	JQ676303
603Seq_sequin_submission_02142012.sqn	Seq_89_GAL1_C95T	JQ676304
603Seq_sequin_submission_02142012.sqn	Seq_90_GAL1_T96G	JQ676305
603Seq_sequin_submission_02142012.sqn	Seq_91_GAL1_T97G	JQ676306
603Seq_sequin_submission_02142012.sqn	Seq_92_GAL1_T98G	JQ676307
603Seq_sequin_submission_02142012.sqn	Seq_93_GAL1_T99A	JQ676308
603Seq_sequin_submission_02142012.sqn	Seq_94_GAL1_A100G	JQ676309
603Seq_sequin_submission_02142012.sqn	Seq_95_GAL1_C101A	JQ676310
603Seq_sequin_submission_02142012.sqn	Seq_96_GAL1_A102G	JQ676311
603Seq_sequin_submission_02142012.sqn	Seq_97_GAL1_A103C	JQ676312
603Seq_sequin_submission_02142012.sqn	Seq_98_GAL1_C104A	JQ676313
603Seq_sequin_submission_02142012.sqn	Seq_99_GAL1_T105G	JQ676314
603Seq_sequin_submission_02142012.sqn	Seq_100_GAL1_T106A	JQ676315
603Seq_sequin_submission_02142012.sqn	Seq_101_GAL1_T107G	JQ676316
603Seq_sequin_submission_02142012.sqn	Seq_102_GAL1_C108A	JQ676317
603Seq_sequin_submission_02142012.sqn	Seq_103_GAL1_A109C	JQ676318
603Seq_sequin_submission_02142012.sqn	Seq_104_GAL1_T110G	JQ676319
603Seq_sequin_submission_02142012.sqn	Seq_105_GAL1_A111T	JQ676320
603Seq_sequin_submission_02142012.sqn	Seq_106_GAL1_A112G	JQ676321
603Seq_sequin_submission_02142012.sqn	Seq_107_GAL1_T113A	JQ676322
603Seq_sequin_submission_02142012.sqn	Seq_108_GAL1_C114A	JQ676323
603Seq_sequin_submission_02142012.sqn	Seq_109_GAL1_A115T	JQ676324
603Seq_sequin_submission_02142012.sqn	Seq_110_GAL1_A116T	JQ676325
603Seq_sequin_submission_02142012.sqn	Seq_111_GAL1_T117G	JQ676326
603Seq_sequin_submission_02142012.sqn	Seq_112_GAL1_T118A	JQ676327
603Seq_sequin_submission_02142012.sqn	Seq_113_GAL1_T119A	JQ676328
603Seq_sequin_submission_02142012.sqn	Seq_114_GAL1_C120A	JQ676329
603Seq_sequin_submission_02142012.sqn	Seq_115_GAL1_A121G	JQ676330
603Seq_sequin_submission_02142012.sqn	Seq_116_GAL1_C122A	JQ676331
603Seq_sequin_submission_02142012.sqn	Seq_117_GAL1_C123A	JQ676332
603Seq_sequin_submission_02142012.sqn	Seq_118_GAL1_A124T	JQ676333
603Seq_sequin_submission_02142012.sqn	Seq_119_GAL1_A125C	JQ676334
603Seq_sequin_submission_02142012.sqn	Seq_120_GAL1_T126G	JQ676335
603Seq_sequin_submission_02142012.sqn	Seq_121_GAL1_A127G	JQ676336
603Seq_sequin_submission_02142012.sqn	Seq_122_GAL1_C128G	JQ676337
603Seq_sequin_submission_02142012.sqn	Seq_123_GAL1_G129T	JQ676338
603Seq_sequin_submission_02142012.sqn	Seq_124_GAL1_T130A	JQ676339
603Seq_sequin_submission_02142012.sqn	Seq_125_GAL1_C131A	JQ676340
603Seq_sequin_submission_02142012.sqn	Seq_126_GAL1_G132A	JQ676341
603Seq_sequin_submission_02142012.sqn	Seq_127_GAL1_A133G	JQ676342
603Seq_sequin_submission_02142012.sqn	Seq_128_GAL1_A134C	JQ676343
603Seq_sequin_submission_02142012.sqn	Seq_129_GAL1_A135C	JQ676344
603Seq_sequin_submission_02142012.sqn	Seq_130_GAL1_A136C	JQ676345
603Seq_sequin_submission_02142012.sqn	Seq_131_GAL1_G137A	JQ676346
603Seq_sequin_submission_02142012.sqn	Seq_132_GAL1_G138A	JQ676347
603Seq_sequin_submission_02142012.sqn	Seq_133_GAL1_T139G	JQ676348
603Seq_sequin_submission_02142012.sqn	Seq_134_GAL1_A140C	JQ676349
603Seq_sequin_submission_02142012.sqn	Seq_135_GAL1_A141T	JQ676350
603Seq_sequin_submission_02142012.sqn	Seq_136_GAL1_A142G	JQ676351
603Seq_sequin_submission_02142012.sqn	Seq_137_GAL1_T143A	JQ676352
603Seq_sequin_submission_02142012.sqn	Seq_138_GAL1_A144C	JQ676353
603Seq_sequin_submission_02142012.sqn	Seq_139_GAL1_T145G	JQ676354
603Seq_sequin_submission_02142012.sqn	Seq_140_GAL1_A146C	JQ676355
603Seq_sequin_submission_02142012.sqn	Seq_141_GAL1_A148T	JQ676356
603Seq_sequin_submission_02142012.sqn	Seq_142_GAL1_G149T	JQ676357
603Seq_sequin_submission_02142012.sqn	Seq_143_GAL1_A150T	JQ676358
603Seq_sequin_submission_02142012.sqn	Seq_144_GAL1_C151G	JQ676359
603Seq_sequin_submission_02142012.sqn	Seq_145_GAL1_A152C	JQ676360
603Seq_sequin_submission_02142012.sqn	Seq_146_GAL1_A153C	JQ676361
603Seq_sequin_submission_02142012.sqn	Seq_147_GAL1_T154G	JQ676362
603Seq_sequin_submission_02142012.sqn	Seq_148_GAL1_T155G	JQ676363
603Seq_sequin_submission_02142012.sqn	Seq_149_GAL1_A156G	JQ676364
603Seq_sequin_submission_02142012.sqn	Seq_150_GAL1_C158A	JQ676365
603Seq_sequin_submission_02142012.sqn	Seq_151_GAL1_A160T	JQ676366
603Seq_sequin_submission_02142012.sqn	Seq_152_GAL1_G161T	JQ676367
603Seq_sequin_submission_02142012.sqn	Seq_153_GAL1_T162A	JQ676368
603Seq_sequin_submission_02142012.sqn	Seq_154_GAL1_T163A	JQ676369
603Seq_sequin_submission_02142012.sqn	Seq_155_GAL1_T164G	JQ676370
603Seq_sequin_submission_02142012.sqn	Seq_156_GAL1_T165A	JQ676371
603Seq_sequin_submission_02142012.sqn	Seq_157_GAL1_T166G	JQ676372
603Seq_sequin_submission_02142012.sqn	Seq_158_GAL1_G168A	JQ676373
603Seq_sequin_submission_02142012.sqn	Seq_159_GAL1_A170G	JQ676374
603Seq_sequin_submission_02142012.sqn	Seq_160_GAL1_G171A	JQ676375
603Seq_sequin_submission_02142012.sqn	Seq_161_GAL1_C172T	JQ676376
603Seq_sequin_submission_02142012.sqn	Seq_162_GAL1_G173T	JQ676377
603Seq_sequin_submission_02142012.sqn	Seq_163_GAL1_A174C	JQ676378
603Seq_sequin_submission_02142012.sqn	Seq_164_GAL1_A175G	JQ676379
603Seq_sequin_submission_02142012.sqn	Seq_165_GAL1_G176A	JQ676380
603Seq_sequin_submission_02142012.sqn	Seq_166_GAL1_C177A	JQ676381
603Seq_sequin_submission_02142012.sqn	Seq_167_GAL1_G178T	JQ676382
603Seq_sequin_submission_02142012.sqn	Seq_168_GAL1_A179G	JQ676383
603Seq_sequin_submission_02142012.sqn	Seq_169_GAL1_C180G	JQ676384
603Seq_sequin_submission_02142012.sqn	Seq_170_GAL1_T181A	JQ676385
603Seq_sequin_submission_02142012.sqn	Seq_171_GAL1_A182G	JQ676386
603Seq_sequin_submission_02142012.sqn	Seq_172_GAL1_A183C	JQ676387
603Seq_sequin_submission_02142012.sqn	Seq_173_GAL1_T184C	JQ676388
603Seq_sequin_submission_02142012.sqn	Seq_174_GAL1_T185C	JQ676389
603Seq_sequin_submission_02142012.sqn	Seq_175_GAL1_A186T	JQ676390
603Seq_sequin_submission_02142012.sqn	Seq_176_GAL1_A187G	JQ676391
603Seq_sequin_submission_02142012.sqn	Seq_177_GAL1_G190T	JQ676392
603Seq_sequin_submission_02142012.sqn	Seq_178_GAL1_G191A	JQ676393
603Seq_sequin_submission_02142012.sqn	Seq_179_GAL1_G192T	JQ676394
603Seq_sequin_submission_02142012.sqn	Seq_180_GAL1_T193C	JQ676395
603Seq_sequin_submission_02142012.sqn	Seq_181_GAL1_C194G	JQ676396
603Seq_sequin_submission_02142012.sqn	Seq_182_GAL1_T195A	JQ676397
603Seq_sequin_submission_02142012.sqn	Seq_183_GAL1_T197G	JQ676398
603Seq_sequin_submission_02142012.sqn	Seq_184_GAL1_A198T	JQ676399
603Seq_sequin_submission_02142012.sqn	Seq_185_GAL1_C201A	JQ676400
603Seq_sequin_submission_02142012.sqn	Seq_186_GAL1_C202G	JQ676401
603Seq_sequin_submission_02142012.sqn	Seq_187_GAL1_G203A	JQ676402
603Seq_sequin_submission_02142012.sqn	Seq_188_GAL1_A204C	JQ676403
603Seq_sequin_submission_02142012.sqn	Seq_189_GAL1_T205C	JQ676404
603Seq_sequin_submission_02142012.sqn	Seq_190_GAL1_T206G	JQ676405
603Seq_sequin_submission_02142012.sqn	Seq_191_GAL1_T207G	JQ676406
603Seq_sequin_submission_02142012.sqn	Seq_192_GAL1_T208A	JQ676407
603Seq_sequin_submission_02142012.sqn	Seq_193_GAL1_T209A	JQ676408
603Seq_sequin_submission_02142012.sqn	Seq_194_GAL1_T210A	JQ676409
603Seq_sequin_submission_02142012.sqn	Seq_195_GAL1_G211A	JQ676410
603Seq_sequin_submission_02142012.sqn	Seq_196_GAL1_A212C	JQ676411
603Seq_sequin_submission_02142012.sqn	Seq_197_GAL1_T213G	JQ676412
603Seq_sequin_submission_02142012.sqn	Seq_198_GAL1_T214A	JQ676413
603Seq_sequin_submission_02142012.sqn	Seq_199_GAL1_A215T	JQ676414
603Seq_sequin_submission_02142012.sqn	Seq_200_GAL1_G216A	JQ676415
603Seq_sequin_submission_02142012.sqn	Seq_201_GAL1_C217T	JQ676416
603Seq_sequin_submission_02142012.sqn	Seq_202_GAL1_G218A	JQ676417
603Seq_sequin_submission_02142012.sqn	Seq_203_GAL1_T219C	JQ676418
603Seq_sequin_submission_02142012.sqn	Seq_204_GAL1_A220G	JQ676419
603Seq_sequin_submission_02142012.sqn	Seq_205_GAL1_A221G	JQ676420
603Seq_sequin_submission_02142012.sqn	Seq_206_GAL1_A223T	JQ676421
603Seq_sequin_submission_02142012.sqn	Seq_207_GAL1_G224A	JQ676422
603Seq_sequin_submission_02142012.sqn	Seq_208_GAL1_T225G	JQ676423
603Seq_sequin_submission_02142012.sqn	Seq_209_GAL1_A226T	JQ676424
603Seq_sequin_submission_02142012.sqn	Seq_210_GAL1_G227T	JQ676425
603Seq_sequin_submission_02142012.sqn	Seq_211_GAL1_G228T	JQ676426
603Seq_sequin_submission_02142012.sqn	Seq_212_GAL1_A229C	JQ676427
603Seq_sequin_submission_02142012.sqn	Seq_213_GAL1_A231C	JQ676428
603Seq_sequin_submission_02142012.sqn	Seq_214_GAL1_C233A	JQ676429
603Seq_sequin_submission_02142012.sqn	Seq_215_GAL1_A234T	JQ676430
603Seq_sequin_submission_02142012.sqn	Seq_216_GAL1_A235C	JQ676431
603Seq_sequin_submission_02142012.sqn	Seq_217_GAL1_C236T	JQ676432
603Seq_sequin_submission_02142012.sqn	Seq_218_GAL1_A237T	JQ676433
603Seq_sequin_submission_02142012.sqn	Seq_219_GAL1_A238G	JQ676434
603Seq_sequin_submission_02142012.sqn	Seq_220_GAL1_T239A	JQ676435
603Seq_sequin_submission_02142012.sqn	Seq_221_GAL1_T240A	JQ676436
603Seq_sequin_submission_02142012.sqn	Seq_222_GAL1_A242T	JQ676437
603Seq_sequin_submission_02142012.sqn	Seq_223_GAL1_A243G	JQ676438
603Seq_sequin_submission_02142012.sqn	Seq_224_GAL1_C244G	JQ676439
603Seq_sequin_submission_02142012.sqn	Seq_225_GAL1_A246C	JQ676440
603Seq_sequin_submission_02142012.sqn	Seq_226_GAL1_A247C	JQ676441
603Seq_sequin_submission_02142012.sqn	Seq_227_GAL1_G248T	JQ676442
603Seq_sequin_submission_02142012.sqn	Seq_228_GAL1_C249G	JQ676443
603Seq_sequin_submission_02142012.sqn	Seq_229_GAL1_A250C	JQ676444
603Seq_sequin_submission_02142012.sqn	Seq_230_GAL1_A251G	JQ676445
603Seq_sequin_submission_02142012.sqn	Seq_231_GAL1_T253A	JQ676446
603Seq_sequin_submission_02142012.sqn	Seq_232_GAL1_A254C	JQ676447
603Seq_sequin_submission_02142012.sqn	Seq_233_GAL1_A255G	JQ676448
603Seq_sequin_submission_02142012.sqn	Seq_234_GAL1_A256C	JQ676449
603Seq_sequin_submission_02142012.sqn	Seq_235_GAL1_C257T	JQ676450
603Seq_sequin_submission_02142012.sqn	Seq_236_GAL1_T258G	JQ676451
603Seq_sequin_submission_02142012.sqn	Seq_237_GAL1_T259G	JQ676452
603Seq_sequin_submission_02142012.sqn	Seq_238_GAL1_C260A	JQ676453
603Seq_sequin_submission_02142012.sqn	Seq_239_GAL1_C261G	JQ676454
603Seq_sequin_submission_02142012.sqn	Seq_240_GAL1_A262T	JQ676455
603Seq_sequin_submission_02142012.sqn	Seq_241_GAL1_A263T	JQ676456
603Seq_sequin_submission_02142012.sqn	Seq_242_GAL1_A264G	JQ676457
603Seq_sequin_submission_02142012.sqn	Seq_243_GAL1_C265T	JQ676458
603Seq_sequin_submission_02142012.sqn	Seq_244_GAL1_A266G	JQ676459
603Seq_sequin_submission_02142012.sqn	Seq_245_GAL1_C267T	JQ676460
603Seq_sequin_submission_02142012.sqn	Seq_246_GAL1_C268A	JQ676461
603Seq_sequin_submission_02142012.sqn	Seq_247_GAL1_C269A	JQ676462
603Seq_sequin_submission_02142012.sqn	Seq_248_GAL1_C270G	JQ676463
603Seq_sequin_submission_02142012.sqn	Seq_249_GAL1_G271T	JQ676464
603Seq_sequin_submission_02142012.sqn	Seq_250_GAL1_G272A	JQ676465
603Seq_sequin_submission_02142012.sqn	Seq_251_GAL1_T273A	JQ676466
603Seq_sequin_submission_02142012.sqn	Seq_252_GAL1_C274A	JQ676467
603Seq_sequin_submission_02142012.sqn	Seq_253_GAL1_C275A	JQ676468
603Seq_sequin_submission_02142012.sqn	Seq_254_GAL1_A276T	JQ676469
603Seq_sequin_submission_02142012.sqn	Seq_255_GAL1_A277T	JQ676470
603Seq_sequin_submission_02142012.sqn	Seq_256_GAL1_T278C	JQ676471
603Seq_sequin_submission_02142012.sqn	Seq_257_GAL1_G279T	JQ676472
603Seq_sequin_submission_02142012.sqn	Seq_258_GAL1_A280C	JQ676473
603Seq_sequin_submission_02142012.sqn	Seq_259_GAL1_C281A	JQ676474
603Seq_sequin_submission_02142012.sqn	Seq_260_GAL1_G282T	JQ676475
603Seq_sequin_submission_02142012.sqn	Seq_261_GAL1_G283A	JQ676476
603Seq_sequin_submission_02142012.sqn	Seq_262_GAL1_T284A	JQ676477
603Seq_sequin_submission_02142012.sqn	Seq_263_GAL1_T285A	JQ676478
603Seq_sequin_submission_02142012.sqn	Seq_264_GAL1_A286T	JQ676479
603Seq_sequin_submission_02142012.sqn	Seq_265_GAL1_A287T	JQ676480
603Seq_sequin_submission_02142012.sqn	Seq_266_GAL1_A288T	JQ676481
603Seq_sequin_submission_02142012.sqn	Seq_267_GAL1_A289T	JQ676482
603Seq_sequin_submission_02142012.sqn	Seq_268_GAL1_A290G	JQ676483
603Seq_sequin_submission_02142012.sqn	Seq_269_GAL1_G291A	JQ676484
603Seq_sequin_submission_02142012.sqn	Seq_270_GAL1_G292T	JQ676485
603Seq_sequin_submission_02142012.sqn	Seq_271_GAL1_A293T	JQ676486
603Seq_sequin_submission_02142012.sqn	Seq_272_GAL1_G294T	JQ676487
603Seq_sequin_submission_02142012.sqn	Seq_273_GAL1_A295G	JQ676488
603Seq_sequin_submission_02142012.sqn	Seq_274_GAL1_A296C	JQ676489
603Seq_sequin_submission_02142012.sqn	Seq_275_GAL1_G297A	JQ676490
603Seq_sequin_submission_02142012.sqn	Seq_276_GAL1_T298A	JQ676491
603Seq_sequin_submission_02142012.sqn	Seq_277_GAL1_A299T	JQ676492
603Seq_sequin_submission_02142012.sqn	Seq_278_GAL1_T300G	JQ676493
603Seq_sequin_submission_02142012.sqn	Seq_279_GAL1_T301C	JQ676494
603Seq_sequin_submission_02142012.sqn	Seq_280_GAL1_G302T	JQ676495
603Seq_sequin_submission_02142012.sqn	Seq_281_GAL1_G303C	JQ676496
603Seq_sequin_submission_02142012.sqn	Seq_282_GAL1_T304G	JQ676497
603Seq_sequin_submission_02142012.sqn	Seq_283_GAL1_A305C	JQ676498
603Seq_sequin_submission_02142012.sqn	Seq_284_GAL1_T306G	JQ676499
603Seq_sequin_submission_02142012.sqn	Seq_285_GAL1_T307G	JQ676500
603Seq_sequin_submission_02142012.sqn	Seq_286_GAL1_T308A	JQ676501
603Seq_sequin_submission_02142012.sqn	Seq_287_GAL1_T309C	JQ676502
603Seq_sequin_submission_02142012.sqn	Seq_288_GAL1_C310T	JQ676503
603Seq_sequin_submission_02142012.sqn	Seq_289_GAL1_G311T	JQ676504
603Seq_sequin_submission_02142012.sqn	Seq_290_GAL1_A312G	JQ676505
603Seq_sequin_submission_02142012.sqn	Seq_291_GAL1_T313C	JQ676506
603Seq_sequin_submission_02142012.sqn	Seq_292_GAL1_C314A	JQ676507
603Seq_sequin_submission_02142012.sqn	Seq_293_GAL1_A315C	JQ676508
603Seq_sequin_submission_02142012.sqn	Seq_294_GAL1_T316A	JQ676509
603Seq_sequin_submission_02142012.sqn	Seq_295_GAL1_A317T	JQ676510
603Seq_sequin_submission_02142012.sqn	Seq_296_GAL1_A318G	JQ676511
603Seq_sequin_submission_02142012.sqn	Seq_297_GAL1_C319T	JQ676512
603Seq_sequin_submission_02142012.sqn	Seq_298_GAL1_A320G	JQ676513
603Seq_sequin_submission_02142012.sqn	Seq_299_GAL1_T321A	JQ676514
603Seq_sequin_submission_02142012.sqn	Seq_300_GAL1_C322A	JQ676515
603Seq_sequin_submission_02142012.sqn	Seq_301_GAL1_T323A	JQ676516
603Seq_sequin_submission_02142012.sqn	Seq_302_GAL1_T324A	JQ676517
603Seq_sequin_submission_02142012.sqn	Seq_303_GAL1_A325C	JQ676518
603Seq_sequin_submission_02142012.sqn	Seq_304_GAL1_G326T	JQ676519
603Seq_sequin_submission_02142012.sqn	Seq_305_GAL1_A327G	JQ676520
603Seq_sequin_submission_02142012.sqn	Seq_306_GAL1_A328T	JQ676521
603Seq_sequin_submission_02142012.sqn	Seq_307_GAL1_A329C	JQ676522
603Seq_sequin_submission_02142012.sqn	Seq_308_GAL1_T330A	JQ676523
603Seq_sequin_submission_02142012.sqn	Seq_309_GAL1_A331C	JQ676524
603Seq_sequin_submission_02142012.sqn	Seq_310_GAL1_C333A	JQ676525
603Seq_sequin_submission_02142012.sqn	Seq_311_GAL1_A334T	JQ676526
603Seq_sequin_submission_02142012.sqn	Seq_312_GAL1_A335G	JQ676527
603Seq_sequin_submission_02142012.sqn	Seq_313_GAL1_G336A	JQ676528
603Seq_sequin_submission_02142012.sqn	Seq_314_GAL1_C337A	JQ676529
603Seq_sequin_submission_02142012.sqn	Seq_315_GAL1_C338A	JQ676530
603Seq_sequin_submission_02142012.sqn	Seq_316_GAL1_T339C	JQ676531
603Seq_sequin_submission_02142012.sqn	Seq_317_GAL1_C340T	JQ676532
603Seq_sequin_submission_02142012.sqn	Seq_318_GAL1_G341A	JQ676533
603Seq_sequin_submission_02142012.sqn	Seq_319_GAL1_T342A	JQ676534
603Seq_sequin_submission_02142012.sqn	Seq_320_GAL1_C343T	JQ676535
603Seq_sequin_submission_02142012.sqn	Seq_321_GAL1_A344G	JQ676536
603Seq_sequin_submission_02142012.sqn	Seq_322_GAL1_C345G	JQ676537
603Seq_sequin_submission_02142012.sqn	Seq_323_GAL1_G346A	JQ676538
603Seq_sequin_submission_02142012.sqn	Seq_324_GAL1_C347T	JQ676539
603Seq_sequin_submission_02142012.sqn	Seq_325_GAL1_G349T	JQ676540
603Seq_sequin_submission_02142012.sqn	Seq_326_GAL1_C350G	JQ676541
603Seq_sequin_submission_02142012.sqn	Seq_327_GAL1_G351T	JQ676542
603Seq_sequin_submission_02142012.sqn	Seq_328_GAL1_C352A	JQ676543
603Seq_sequin_submission_02142012.sqn	Seq_329_GAL1_C354A	JQ676544
603Seq_sequin_submission_02142012.sqn	Seq_330_GAL1_C355A	JQ676545
603Seq_sequin_submission_02142012.sqn	Seq_331_GAL1_G356A	JQ676546
603Seq_sequin_submission_02142012.sqn	Seq_332_GAL1_T357C	JQ676547
603Seq_sequin_submission_02142012.sqn	Seq_333_GAL1_G358A	JQ676548
603Seq_sequin_submission_02142012.sqn	Seq_334_GAL1_T359A	JQ676549
603Seq_sequin_submission_02142012.sqn	Seq_335_GAL1_A360G	JQ676550
603Seq_sequin_submission_02142012.sqn	Seq_336_GAL1_G361T	JQ676551
603Seq_sequin_submission_02142012.sqn	Seq_337_GAL1_A362T	JQ676552
603Seq_sequin_submission_02142012.sqn	Seq_338_GAL1_C363T	JQ676553
603Seq_sequin_submission_02142012.sqn	Seq_339_GAL1_G364A	JQ676554
603Seq_sequin_submission_02142012.sqn	Seq_340_GAL1_A366G	JQ676555
603Seq_sequin_submission_02142012.sqn	Seq_341_GAL1_A367C	JQ676556
603Seq_sequin_submission_02142012.sqn	Seq_342_GAL1_A368C	JQ676557
603Seq_sequin_submission_02142012.sqn	Seq_343_GAL1_G369T	JQ676558
603Seq_sequin_submission_02142012.sqn	Seq_344_GAL1_T370C	JQ676559
603Seq_sequin_submission_02142012.sqn	Seq_345_GAL1_C371A	JQ676560
603Seq_sequin_submission_02142012.sqn	Seq_346_GAL1_C372T	JQ676561
603Seq_sequin_submission_02142012.sqn	Seq_347_GAL1_T374G	JQ676562
603Seq_sequin_submission_02142012.sqn	Seq_348_GAL1_G375A	JQ676563
603Seq_sequin_submission_02142012.sqn	Seq_349_GAL1_C376A	JQ676564
603Seq_sequin_submission_02142012.sqn	Seq_350_GAL1_G377A	JQ676565
603Seq_sequin_submission_02142012.sqn	Seq_351_GAL1_C378T	JQ676566
603Seq_sequin_submission_02142012.sqn	Seq_352_GAL1_G380A	JQ676567
603Seq_sequin_submission_02142012.sqn	Seq_353_GAL1_G381T	JQ676568
603Seq_sequin_submission_02142012.sqn	Seq_354_GAL1_C382G	JQ676569
603Seq_sequin_submission_02142012.sqn	Seq_355_GAL1_C383T	JQ676570
603Seq_sequin_submission_02142012.sqn	Seq_356_GAL1_A384G	JQ676571
603Seq_sequin_submission_02142012.sqn	Seq_357_GAL1_C385T	JQ676572
603Seq_sequin_submission_02142012.sqn	Seq_358_GAL1_T387G	JQ676573
603Seq_sequin_submission_02142012.sqn	Seq_359_GAL1_C388T	JQ676574
603Seq_sequin_submission_02142012.sqn	Seq_360_GAL1_T389A	JQ676575
603Seq_sequin_submission_02142012.sqn	Seq_361_GAL1_G390A	JQ676576
603Seq_sequin_submission_02142012.sqn	Seq_362_GAL1_C391T	JQ676577
603Seq_sequin_submission_02142012.sqn	Seq_363_GAL1_C393A	JQ676578
603Seq_sequin_submission_02142012.sqn	Seq_364_GAL1_C394G	JQ676579
603Seq_sequin_submission_02142012.sqn	Seq_365_GAL1_T395A	JQ676580
603Seq_sequin_submission_02142012.sqn	Seq_366_GAL1_G396C	JQ676581
603Seq_sequin_submission_02142012.sqn	Seq_367_GAL1_C397G	JQ676582
603Seq_sequin_submission_02142012.sqn	Seq_368_GAL1_G398A	JQ676583
603Seq_sequin_submission_02142012.sqn	Seq_369_GAL1_T399A	JQ676584
603Seq_sequin_submission_02142012.sqn	Seq_370_GAL1_G400T	JQ676585
603Seq_sequin_submission_02142012.sqn	Seq_371_GAL1_C401A	JQ676586
603Seq_sequin_submission_02142012.sqn	Seq_372_GAL1_C402T	JQ676587
603Seq_sequin_submission_02142012.sqn	Seq_373_GAL1_T403C	JQ676588
603Seq_sequin_submission_02142012.sqn	Seq_374_GAL1_C404A	JQ676589
603Seq_sequin_submission_02142012.sqn	Seq_375_GAL1_C405A	JQ676590
603Seq_sequin_submission_02142012.sqn	Seq_376_GAL1_T406A	JQ676591
603Seq_sequin_submission_02142012.sqn	Seq_377_GAL1_C407T	JQ676592
603Seq_sequin_submission_02142012.sqn	Seq_378_GAL1_T408A	JQ676593
603Seq_sequin_submission_02142012.sqn	Seq_379_GAL1_C409G	JQ676594
603Seq_sequin_submission_02142012.sqn	Seq_380_GAL1_G411T	JQ676595
603Seq_sequin_submission_02142012.sqn	Seq_381_GAL1_A412G	JQ676596
603Seq_sequin_submission_02142012.sqn	Seq_382_GAL1_A413G	JQ676597
603Seq_sequin_submission_02142012.sqn	Seq_383_GAL1_G414T	JQ676598
603Seq_sequin_submission_02142012.sqn	Seq_384_GAL1_G415T	JQ676599
603Seq_sequin_submission_02142012.sqn	Seq_385_GAL1_C416A	JQ676600
603Seq_sequin_submission_02142012.sqn	Seq_386_GAL1_G418A	JQ676601
603Seq_sequin_submission_02142012.sqn	Seq_387_GAL1_C419A	JQ676602
603Seq_sequin_submission_02142012.sqn	Seq_388_GAL1_C420G	JQ676603
603Seq_sequin_submission_02142012.sqn	Seq_389_GAL1_T421A	JQ676604
603Seq_sequin_submission_02142012.sqn	Seq_390_GAL1_C422T	JQ676605
603Seq_sequin_submission_02142012.sqn	Seq_391_GAL1_C423A	JQ676606
603Seq_sequin_submission_02142012.sqn	Seq_392_GAL1_C424A	JQ676607
603Seq_sequin_submission_02142012.sqn	Seq_393_GAL1_G425T	JQ676608
603Seq_sequin_submission_02142012.sqn	Seq_394_GAL1_A426C	JQ676609
603Seq_sequin_submission_02142012.sqn	Seq_395_GAL1_C427G	JQ676610
603Seq_sequin_submission_02142012.sqn	Seq_396_GAL1_A428T	JQ676611
603Seq_sequin_submission_02142012.sqn	Seq_397_GAL1_G429A	JQ676612
603Seq_sequin_submission_02142012.sqn	Seq_398_GAL1_C430T	JQ676613
603Seq_sequin_submission_02142012.sqn	Seq_399_GAL1_G431A	JQ676614
603Seq_sequin_submission_02142012.sqn	Seq_400_GAL1_G433T	JQ676615
603Seq_sequin_submission_02142012.sqn	Seq_401_GAL1_C434T	JQ676616
603Seq_sequin_submission_02142012.sqn	Seq_402_GAL1_G435T	JQ676617
603Seq_sequin_submission_02142012.sqn	Seq_403_GAL1_A436T	JQ676618
603Seq_sequin_submission_02142012.sqn	Seq_404_GAL1_G437A	JQ676619
603Seq_sequin_submission_02142012.sqn	Seq_405_GAL1_C438A	JQ676620
603Seq_sequin_submission_02142012.sqn	Seq_406_GAL1_C439G	JQ676621
603Seq_sequin_submission_02142012.sqn	Seq_407_GAL1_G440A	JQ676622
603Seq_sequin_submission_02142012.sqn	Seq_408_GAL1_C441T	JQ676623
603Seq_sequin_submission_02142012.sqn	Seq_409_GAL1_C442G	JQ676624
603Seq_sequin_submission_02142012.sqn	Seq_410_GAL1_G443T	JQ676625
603Seq_sequin_submission_02142012.sqn	Seq_411_GAL1_A444C	JQ676626
603Seq_sequin_submission_02142012.sqn	Seq_412_GAL1_A445C	JQ676627
603Seq_sequin_submission_02142012.sqn	Seq_413_GAL1_G446A	JQ676628
603Seq_sequin_submission_02142012.sqn	Seq_414_GAL1_T448A	JQ676629
603Seq_sequin_submission_02142012.sqn	Seq_415_GAL1_T449G	JQ676630
603Seq_sequin_submission_02142012.sqn	Seq_416_GAL1_A450G	JQ676631
603Seq_sequin_submission_02142012.sqn	Seq_417_GAL1_G451A	JQ676632
603Seq_sequin_submission_02142012.sqn	Seq_418_GAL1_G452T	JQ676633
603Seq_sequin_submission_02142012.sqn	Seq_419_GAL1_C453G	JQ676634
603Seq_sequin_submission_02142012.sqn	Seq_420_GAL1_A454T	JQ676635
603Seq_sequin_submission_02142012.sqn	Seq_421_GAL1_T455A	JQ676636
603Seq_sequin_submission_02142012.sqn	Seq_422_GAL1_G456A	JQ676637
603Seq_sequin_submission_02142012.sqn	Seq_423_GAL1_A457G	JQ676638
603Seq_sequin_submission_02142012.sqn	Seq_424_GAL1_A458G	JQ676639
603Seq_sequin_submission_02142012.sqn	Seq_425_GAL1_G459A	JQ676640
603Seq_sequin_submission_02142012.sqn	Seq_426_GAL1_T460C	JQ676641
603Seq_sequin_submission_02142012.sqn	Seq_427_GAL1_T461A	JQ676642
603Seq_sequin_submission_02142012.sqn	Seq_428_GAL1_A462G	JQ676643
603Seq_sequin_submission_02142012.sqn	Seq_429_GAL1_T463A	JQ676644
603Seq_sequin_submission_02142012.sqn	Seq_430_GAL1_A464T	JQ676645
603Seq_sequin_submission_02142012.sqn	Seq_431_GAL1_T465C	JQ676646
603Seq_sequin_submission_02142012.sqn	Seq_432_GAL1_C466A	JQ676647
603Seq_sequin_submission_02142012.sqn	Seq_433_GAL1_G467T	JQ676648
603Seq_sequin_submission_02142012.sqn	Seq_434_GAL1_T468A	JQ676649
603Seq_sequin_submission_02142012.sqn	Seq_435_GAL1_T469G	JQ676650
603Seq_sequin_submission_02142012.sqn	Seq_436_GAL1_A470T	JQ676651
603Seq_sequin_submission_02142012.sqn	Seq_437_GAL1_C471A	JQ676652
603Seq_sequin_submission_02142012.sqn	Seq_438_GAL1_T472A	JQ676653
603Seq_sequin_submission_02142012.sqn	Seq_439_GAL1_C473G	JQ676654
603Seq_sequin_submission_02142012.sqn	Seq_440_GAL1_G474A	JQ676655
603Seq_sequin_submission_02142012.sqn	Seq_441_GAL1_T475C	JQ676656
603Seq_sequin_submission_02142012.sqn	Seq_442_GAL1_C476T	JQ676657
603Seq_sequin_submission_02142012.sqn	Seq_443_GAL1_A477T	JQ676658
603Seq_sequin_submission_02142012.sqn	Seq_444_GAL1_A478G	JQ676659
603Seq_sequin_submission_02142012.sqn	Seq_445_GAL1_T479A	JQ676660
603Seq_sequin_submission_02142012.sqn	Seq_446_GAL1_T480A	JQ676661
603Seq_sequin_submission_02142012.sqn	Seq_447_GAL1_C481T	JQ676662
603Seq_sequin_submission_02142012.sqn	Seq_448_GAL1_C483A	JQ676663
603Seq_sequin_submission_02142012.sqn	Seq_449_GAL1_T485A	JQ676664
603Seq_sequin_submission_02142012.sqn	Seq_450_GAL1_A486G	JQ676665
603Seq_sequin_submission_02142012.sqn	Seq_451_GAL1_A487G	JQ676666
603Seq_sequin_submission_02142012.sqn	Seq_452_GAL1_T488A	JQ676667
603Seq_sequin_submission_02142012.sqn	Seq_453_GAL1_G489A	JQ676668
603Seq_sequin_submission_02142012.sqn	Seq_454_GAL1_A490T	JQ676669
603Seq_sequin_submission_02142012.sqn	Seq_455_GAL1_C491A	JQ676670
603Seq_sequin_submission_02142012.sqn	Seq_456_GAL1_T493G	JQ676671
603Seq_sequin_submission_02142012.sqn	Seq_457_GAL1_C495T	JQ676672
603Seq_sequin_submission_02142012.sqn	Seq_458_GAL1_A497T	JQ676673
603Seq_sequin_submission_02142012.sqn	Seq_459_GAL1_G498C	JQ676674
603Seq_sequin_submission_02142012.sqn	Seq_460_GAL1_G499A	JQ676675
603Seq_sequin_submission_02142012.sqn	Seq_461_GAL1_T500C	JQ676676
603Seq_sequin_submission_02142012.sqn	Seq_462_GAL1_T501G	JQ676677
603Seq_sequin_submission_02142012.sqn	Seq_463_GAL1_T502G	JQ676678
603Seq_sequin_submission_02142012.sqn	Seq_464_GAL1_C503G	JQ676679
603Seq_sequin_submission_02142012.sqn	Seq_465_GAL1_T504C	JQ676680
603Seq_sequin_submission_02142012.sqn	Seq_466_GAL1_C505A	JQ676681
603Seq_sequin_submission_02142012.sqn	Seq_467_GAL1_T507A	JQ676682
603Seq_sequin_submission_02142012.sqn	Seq_468_GAL1_C508T	JQ676683
603Seq_sequin_submission_02142012.sqn	Seq_469_GAL1_C509G	JQ676684
603Seq_sequin_submission_02142012.sqn	Seq_470_GAL1_A510T	JQ676685
603Seq_sequin_submission_02142012.sqn	Seq_471_GAL1_A511T	JQ676686
603Seq_sequin_submission_02142012.sqn	Seq_472_GAL1_A512T	JQ676687
603Seq_sequin_submission_02142012.sqn	Seq_473_GAL1_A513T	JQ676688
603Seq_sequin_submission_02142012.sqn	Seq_474_GAL1_A514T	JQ676689
603Seq_sequin_submission_02142012.sqn	Seq_475_GAL1_A515T	JQ676690
603Seq_sequin_submission_02142012.sqn	Seq_476_GAL1_A516G	JQ676691
603Seq_sequin_submission_02142012.sqn	Seq_477_GAL1_T517C	JQ676692
603Seq_sequin_submission_02142012.sqn	Seq_478_GAL1_C518A	JQ676693
603Seq_sequin_submission_02142012.sqn	Seq_479_GAL1_C519T	JQ676694
603Seq_sequin_submission_02142012.sqn	Seq_480_GAL1_G520T	JQ676695
603Seq_sequin_submission_02142012.sqn	Seq_481_GAL1_T522A	JQ676696
603Seq_sequin_submission_02142012.sqn	Seq_482_GAL1_T523A	JQ676697
603Seq_sequin_submission_02142012.sqn	Seq_483_GAL1_C524G	JQ676698
603Seq_sequin_submission_02142012.sqn	Seq_484_GAL1_T525A	JQ676699
603Seq_sequin_submission_02142012.sqn	Seq_485_GAL1_T527A	JQ676700
603Seq_sequin_submission_02142012.sqn	Seq_486_GAL1_T528A	JQ676701
603Seq_sequin_submission_02142012.sqn	Seq_487_GAL1_A529T	JQ676702
603Seq_sequin_submission_02142012.sqn	Seq_488_GAL1_C530T	JQ676703
603Seq_sequin_submission_02142012.sqn	Seq_489_GAL1_C531A	JQ676704
603Seq_sequin_submission_02142012.sqn	Seq_490_GAL1_C532T	JQ676705
603Seq_sequin_submission_02142012.sqn	Seq_491_GAL1_C533T	JQ676706
603Seq_sequin_submission_02142012.sqn	Seq_492_GAL1_G534A	JQ676707
603Seq_sequin_submission_02142012.sqn	Seq_493_GAL1_A535T	JQ676708
603Seq_sequin_submission_02142012.sqn	Seq_494_GAL1_G536T	JQ676709
603Seq_sequin_submission_02142012.sqn	Seq_495_GAL1_A537C	JQ676710
603Seq_sequin_submission_02142012.sqn	Seq_496_GAL1_A538T	JQ676711
603Seq_sequin_submission_02142012.sqn	Seq_497_GAL1_A539T	JQ676712
603Seq_sequin_submission_02142012.sqn	Seq_498_GAL1_T540C	JQ676713
603Seq_sequin_submission_02142012.sqn	Seq_499_GAL1_G541T	JQ676714
603Seq_sequin_submission_02142012.sqn	Seq_500_GAL1_T542G	JQ676715
603Seq_sequin_submission_02142012.sqn	Seq_501_GAL1_A543T	JQ676716
603Seq_sequin_submission_02142012.sqn	Seq_502_GAL1_A544T	JQ676717
603Seq_sequin_submission_02142012.sqn	Seq_503_GAL1_A545T	JQ676718
603Seq_sequin_submission_02142012.sqn	Seq_504_GAL1_G546T	JQ676719
603Seq_sequin_submission_02142012.sqn	Seq_505_GAL1_G547T	JQ676720
603Seq_sequin_submission_02142012.sqn	Seq_506_GAL1_G549A	JQ676721
603Seq_sequin_submission_02142012.sqn	Seq_507_GAL1_T550A	JQ676722
603Seq_sequin_submission_02142012.sqn	Seq_508_GAL1_T551G	JQ676723
603Seq_sequin_submission_02142012.sqn	Seq_509_GAL1_G552C	JQ676724
603Seq_sequin_submission_02142012.sqn	Seq_510_GAL1_T553A	JQ676725
603Seq_sequin_submission_02142012.sqn	Seq_511_GAL1_A554G	JQ676726
603Seq_sequin_submission_02142012.sqn	Seq_512_GAL1_T555G	JQ676727
603Seq_sequin_submission_02142012.sqn	Seq_513_GAL1_A556G	JQ676728
603Seq_sequin_submission_02142012.sqn	Seq_514_GAL1_T557C	JQ676729
603Seq_sequin_submission_02142012.sqn	Seq_515_GAL1_T558G	JQ676730
603Seq_sequin_submission_02142012.sqn	Seq_516_GAL1_C559A	JQ676731
603Seq_sequin_submission_02142012.sqn	Seq_517_GAL1_A560G	JQ676732
603Seq_sequin_submission_02142012.sqn	Seq_518_GAL1_T561C	JQ676733
603Seq_sequin_submission_02142012.sqn	Seq_519_GAL1_T562A	JQ676734
603Seq_sequin_submission_02142012.sqn	Seq_520_GAL1_C563T	JQ676735
603Seq_sequin_submission_02142012.sqn	Seq_521_GAL1_T564A	JQ676736
603Seq_sequin_submission_02142012.sqn	Seq_522_GAL1_A565C	JQ676737
603Seq_sequin_submission_02142012.sqn	Seq_523_GAL1_A566T	JQ676738
603Seq_sequin_submission_02142012.sqn	Seq_524_GAL1_T567C	JQ676739
603Seq_sequin_submission_02142012.sqn	Seq_525_GAL1_C568A	JQ676740
603Seq_sequin_submission_02142012.sqn	Seq_526_GAL1_T569A	JQ676741
603Seq_sequin_submission_02142012.sqn	Seq_527_GAL1_A570G	JQ676742
603Seq_sequin_submission_02142012.sqn	Seq_528_GAL1_T571A	JQ676743
603Seq_sequin_submission_02142012.sqn	Seq_529_GAL1_A572T	JQ676744
603Seq_sequin_submission_02142012.sqn	Seq_530_GAL1_C573A	JQ676745
603Seq_sequin_submission_02142012.sqn	Seq_531_GAL1_C574T	JQ676746
603Seq_sequin_submission_02142012.sqn	Seq_532_GAL1_T575A	JQ676747
603Seq_sequin_submission_02142012.sqn	Seq_533_GAL1_A576T	JQ676748
603Seq_sequin_submission_02142012.sqn	Seq_534_GAL1_A578T	JQ676749
603Seq_sequin_submission_02142012.sqn	Seq_535_GAL1_C579T	JQ676750
603Seq_sequin_submission_02142012.sqn	Seq_536_GAL1_A580T	JQ676751
603Seq_sequin_submission_02142012.sqn	Seq_537_GAL1_T581A	JQ676752
603Seq_sequin_submission_02142012.sqn	Seq_538_GAL1_A582T	JQ676753
603Seq_sequin_submission_02142012.sqn	Seq_539_GAL1_T583C	JQ676754
603Seq_sequin_submission_02142012.sqn	Seq_540_GAL1_A584G	JQ676755
603Seq_sequin_submission_02142012.sqn	Seq_541_GAL1_C585G	JQ676756
603Seq_sequin_submission_02142012.sqn	Seq_542_GAL1_C586A	JQ676757
603Seq_sequin_submission_02142012.sqn	Seq_543_GAL1_A587T	JQ676758
603Seq_sequin_submission_02142012.sqn	Seq_544_GAL1_C588T	JQ676759
603Seq_sequin_submission_02142012.sqn	Seq_545_GAL1_C589T	JQ676760
603Seq_sequin_submission_02142012.sqn	Seq_546_GAL1_A590T	JQ676761
603Seq_sequin_submission_02142012.sqn	Seq_547_GAL1_T591A	JQ676762
603Seq_sequin_submission_02142012.sqn	Seq_548_GAL1_T592A	JQ676763
603Seq_sequin_submission_02142012.sqn	Seq_549_GAL1_A593T	JQ676764
603Seq_sequin_submission_02142012.sqn	Seq_550_GAL1_G595A	JQ676765
603Seq_sequin_submission_02142012.sqn	Seq_551_GAL1_G596T	JQ676766
603Seq_sequin_submission_02142012.sqn	Seq_552_GAL1_T597C	JQ676767
603Seq_sequin_submission_02142012.sqn	Seq_553_GAL1_A598G	JQ676768
603Seq_sequin_submission_02142012.sqn	Seq_554_GAL1_C599G	JQ676769
603Seq_sequin_submission_02142012.sqn	Seq_555_GAL1_A600T	JQ676770
603Seq_sequin_submission_02142012.sqn	Seq_556_GAL1_T601A	JQ676771
603Seq_sequin_submission_02142012.sqn	Seq_557_GAL1_A603T	JQ676772
603Seq_sequin_submission_02142012.sqn	Seq_558_GAL1_T604C	JQ676773
603Seq_sequin_submission_02142012.sqn	Seq_559_GAL1_A605G	JQ676774
603Seq_sequin_submission_02142012.sqn	Seq_560_GAL1_C606G	JQ676775
603Seq_sequin_submission_02142012.sqn	Seq_561_GAL1_T607C	JQ676776
603Seq_sequin_submission_02142012.sqn	Seq_562_GAL1_A608G	JQ676777
603Seq_sequin_submission_02142012.sqn	Seq_563_GAL1_A609G	JQ676778
603Seq_sequin_submission_02142012.sqn	Seq_564_GAL1_T610C	JQ676779
603Seq_sequin_submission_02142012.sqn	Seq_565_GAL1_A611T	JQ676780
603Seq_sequin_submission_02142012.sqn	Seq_566_GAL1_A612G	JQ676781
603Seq_sequin_submission_02142012.sqn	Seq_567_GAL1_T613A	JQ676782
603Seq_sequin_submission_02142012.sqn	Seq_568_GAL1_T614C	JQ676783
603Seq_sequin_submission_02142012.sqn	Seq_569_GAL1_G616A	JQ676784
603Seq_sequin_submission_02142012.sqn	Seq_570_GAL1_A617T	JQ676785
603Seq_sequin_submission_02142012.sqn	Seq_571_GAL1_A618T	JQ676786
603Seq_sequin_submission_02142012.sqn	Seq_572_GAL1_G619A	JQ676787
603Seq_sequin_submission_02142012.sqn	Seq_573_GAL1_A620T	JQ676788
603Seq_sequin_submission_02142012.sqn	Seq_574_GAL1_A622T	JQ676789
603Seq_sequin_submission_02142012.sqn	Seq_575_GAL1_C623G	JQ676790
603Seq_sequin_submission_02142012.sqn	Seq_576_GAL1_G624T	JQ676791
603Seq_sequin_submission_02142012.sqn	Seq_577_GAL1_C625A	JQ676792
603Seq_sequin_submission_02142012.sqn	Seq_578_GAL1_A626T	JQ676793
603Seq_sequin_submission_02142012.sqn	Seq_579_GAL1_G627T	JQ676794
603Seq_sequin_submission_02142012.sqn	Seq_580_GAL1_G628T	JQ676795
603Seq_sequin_submission_02142012.sqn	Seq_581_GAL1_T629A	JQ676796
603Seq_sequin_submission_02142012.sqn	Seq_582_GAL1_A630T	JQ676797
603Seq_sequin_submission_02142012.sqn	CHA1_YCL064C_409bp_chrIII:16881-17289_T_To_C	JQ676798
603Seq_sequin_submission_02142012.sqn	ARG4_YHR018C_491bp_chrVIII:141396-141886_T_To_C	JQ676799
603Seq_sequin_submission_02142012.sqn	GCD11_YER025W_287bp_chrVIII:141396-141886_C_To_G	JQ676800
603Seq_sequin_submission_02142012.sqn	UTP10_YJL109C_395bp_chrX:217306-217700_T_To_A	JQ676801
603Seq_sequin_submission_02142012.sqn	HCA4_YJL033W_461bp_chrX:383371-383831_T_To_A	JQ676802
603Seq_sequin_submission_02142012.sqn	PRP43_YGL120C_504bp_chrVII:283944-284447_T_To_C	JQ676803
603Seq_sequin_submission_02142012.sqn	RER2_YBR002C_240bp_chrII:242571-242810_T_To_A	JQ676804
603Seq_sequin_submission_02142012.sqn	GCD2_YGR083C_307bp_chrVII:646820-647126_T_To_A	JQ676805
603Seq_sequin_submission_02142012.sqn	ILV1_YER086W_336bp_chrV:328137-328472_A_To_T	JQ676806
603Seq_sequin_submission_02142012.sqn	GET3_YDL100C_242bp_chrIV:283177-283418_T_To_A	JQ676807
603Seq_sequin_submission_02142012.sqn	CDC10_YCR002C_271bp_chrIII:118347-118617_G_To_A	JQ676808
603Seq_sequin_submission_02142012.sqn	SNA4_YDL123W_220bp_chrIV:241198-241417_C_To_A	JQ676809
603Seq_sequin_submission_02142012.sqn	SHR3_YDL212W_459bp_chrIV:77968-78426_C_To_T	JQ676810
603Seq_sequin_submission_02142012.sqn	GCD14_YJL125C_447bp_chrX:186678-187124_T_To_A	JQ676811
603Seq_sequin_submission_02142012.sqn	SPT16_YGL207W_383bp_chrVII:98590-98972_G_To_A	JQ676812
603Seq_sequin_submission_02142012.sqn	RNA15_YGL044C_446bp_chrVII:417041-417486_T_To_A	JQ676813
603Seq_sequin_submission_02142012.sqn	WBP1_YEL002C_286bp_chrV:150014-150299_A_To_C	JQ676814
603Seq_sequin_submission_02142012.sqn	TIP20_YGL145W_556bp_chrVII:229692-230247_A_To_G	JQ676815
603Seq_sequin_submission_02142012.sqn	TSC10_YBR265W_212bp_chrII:738365-738576_A_To_T	JQ676816
603Seq_sequin_submission_02142012.sqn	TAF6_YGL112C_249bp_chrVII:299732-299980_A_To_T	JQ676817
603Seq_sequin_submission_02142012.sqn	YGL082W_354bp_chrVII:355476-355829_C_To_G	JQ676818
